# Supplementary material for: Molecular Profiling and Clinical Outcome of High-Grade Serous Ovarian Cancer Presenting with Low- versus High-Volume Ascites
Source: Hindawi journal article supplement (doi:10.1155/2014/367103), 2014-01-01
Supplement: f1 [file 367103.f1.pdf]

Supplemental Table 1S

**Supplemental Table S1: Probes differentially expressed in primary tumors from patients with low- and high-volume ascites as determined by a moderated t-test and with a minimum 1.5-fold cut off**

\*Regulation refers to low-volume ascites relative to high-volume ascites

Red highlights are Probes also significant with Westfall and Young FWER correction

| Probe_Id     | Symbol       | Entrez_Gene_ID | Definition                                  |
|--------------|--------------|----------------|---------------------------------------------|
| ILMN_2393765 | IGLL1        | 3543           | Homo sapiens immunoglobulin lambda-like     |
| ILMN_1695311 | HLA-DMA      | 3108           | Homo sapiens major histocompatibility com   |
| ILMN_2376205 | LTB          | 4050           | Homo sapiens lymphotoxin beta (TNF supe     |
| ILMN_1761733 | HLA-DMB      | 3109           | Homo sapiens major histocompatibility com   |
| ILMN_3228688 | LOC730415    | 730415         | PREDICTED: Homo sapiens hypothetical L      |
| ILMN_1791759 | CXCL10       | 3627           | Homo sapiens chemokine (C-X-C motif) lig    |
| ILMN_2098126 | CCL5         | 6352           | Homo sapiens chemokine (C-C motif) ligan    |
| ILMN_2157441 | HLA-DRA      | 3122           | Homo sapiens major histocompatibility com   |
| ILMN_1798177 | CHURC1       | 91612          | Homo sapiens churchill domain containing    |
| ILMN_1772218 | HLA-DPA1     | 3113           | Homo sapiens major histocompatibility com   |
| ILMN_1752592 | HLA-DRB4     | 3126           | Homo sapiens major histocompatibility com   |
| ILMN_2066066 | HLA-DRB6     | 3128           | Homo sapiens major histocompatibility com   |
| ILMN_2083066 | IGLL3        | 91353          | Homo sapiens immunoglobulin lambda-like     |
| ILMN_3241554 | KANK4        | 163782         | Homo sapiens KN motif and ankyrin repeat    |
| ILMN_1751079 | TAP1         | 6890           | Homo sapiens transporter 1, ATP-binding c   |
| ILMN_1662358 | MX1          | 4599           | Homo sapiens myxovirus (influenza virus) r  |
| ILMN_1696657 | LRRN2        | 10446          | Homo sapiens leucine rich repeat neuronal   |
| ILMN_1796316 | MMP9         | 4318           | Homo sapiens matrix metalloproteinase 9 (g  |
| ILMN_2379644 | CD74         | 972            | Homo sapiens CD74 molecule, major histo     |
| ILMN_1689655 | HLA-DRA      | 3122           | Homo sapiens major histocompatibility com   |
| ILMN_2109708 | ECGF1        | 1890           | Homo sapiens endothelial cell growth facto  |
| ILMN_1736567 | CD74         | 972            | Homo sapiens CD74 molecule, major histo     |
| ILMN_1789007 | APOC1        | 341            | Homo sapiens apolipoprotein C-I (APOC1),    |
| ILMN_1691364 | STAT1        | 6772           | Homo sapiens signal transducer and activa   |
| ILMN_2368530 | IL32         | 9235           | Homo sapiens interleukin 32 (IL32), transcr |
| ILMN_2396444 | CD14         | 929            | Homo sapiens CD14 molecule (CD14), tran     |
| ILMN_1815895 | LOC649143    | 649143         | PREDICTED: Homo sapiens similar to HLA      |
| ILMN_2175912 | ITGB2        | 3689           | Homo sapiens integrin, beta 2 (complemen    |
| ILMN_1714861 | CD68         | 968            | Homo sapiens CD68 antigen (CD68), mRN       |
| ILMN_1729749 | HERC5        | 51191          | Homo sapiens hect domain and RLD 5 (HE      |
| ILMN_1654396 | ITGB2        | 3689           | Homo sapiens integrin, beta 2 (antigen CD   |
| ILMN_1740938 | APOE         | 348            | Homo sapiens apolipoprotein E (APOE), ml    |
| ILMN_2103107 | ADAMDEC1     | 27299          | Homo sapiens ADAM-like, decysin 1 (ADAM     |
| ILMN_1745356 | CXCL9        | 4283           | Homo sapiens chemokine (C-X-C motif) lig    |
| ILMN_3243714 | LOC642073    | 642073         | PREDICTED: Homo sapiens similar to MHC      |
| ILMN_1728478 | CXCL16       | 58191          | Homo sapiens chemokine (C-X-C motif) lig    |
| ILMN_1674063 | OAS2         | 4939           | Homo sapiens 2'-5'-oligoadenylate synthet   |
| ILMN_2246083 | C7orf28B     | 221960         | Homo sapiens chromosome 7 open reading      |
| ILMN_3249667 | LOC100133678 | 100133678      | PREDICTED: Homo sapiens similar to hCC      |
| ILMN_1808405 | HLA-DQA1     | 3117           | PREDICTED: Homo sapiens major histocor      |
| ILMN_1690105 | STAT1        | 6772           | Homo sapiens signal transducer and activa   |
| ILMN_1804663 | THBS3        | 7059           | Homo sapiens thrombospondin 3 (THBS3),      |
| ILMN_2388547 | EPSTI1       | 94240          | Homo sapiens epithelial stromal interaction |
| ILMN_1669928 | ARHGEF16     | 27237          | Homo sapiens Rho guanine exchange fact      |

Supplemental Table 1S

|              |           |           |                                                       |
|--------------|-----------|-----------|-------------------------------------------------------|
| ILMN_1733811 | JUP       | 3728      | Homo sapiens junction plakoglobin (JUP), t            |
| ILMN_1812031 | PALM      | 5064      | Homo sapiens paralemmin (PALM), transcr               |
| ILMN_2075189 | SLC35F2   | 54733     | Homo sapiens solute carrier family 35, men            |
| ILMN_1772964 | CCL8      | 6355      | Homo sapiens chemokine (C-C motif) ligan              |
| ILMN_1682864 | SPSB3     | 90864     | Homo sapiens sPLA/ryanodine receptor don              |
| ILMN_1701413 | PIGQ      | 9091      | Homo sapiens phosphatidylinositol glycan ε            |
| ILMN_2387471 | FLJ22184  | 80164     | Homo sapiens hypothetical protein FLJ22184            |
| ILMN_1796409 | C1QB      | 713       | Homo sapiens complement component 1, c                |
| ILMN_1727479 | TPRG1L    | 127262    | Homo sapiens tumor protein p63 regulated              |
| ILMN_1665909 | LASP1     | 3927      | Homo sapiens LIM and SH3 protein 1 (LAS               |
| ILMN_2115218 | ANKRD10   | 55608     | Homo sapiens ankyrin repeat domain 10 (A              |
| ILMN_1723042 | CLDN3     | 1365      | Homo sapiens claudin 3 (CLDN3), mRNA.                 |
| ILMN_1781373 | IFIH1     | 64135     | Homo sapiens interferon induced with helic            |
| ILMN_3233930 | LOC390557 | 390557    | PREDICTED: Homo sapiens hypothetical L                |
| ILMN_2352121 | NT5C3     | 51251     | Homo sapiens 5'-nucleotidase, cytosolic III           |
| ILMN_1680996 | ALOX5     | 240       | PREDICTED: Homo sapiens arachidonate :                |
| ILMN_1800451 | MED16     | 10025     | Homo sapiens mediator complex subunit 16              |
| ILMN_1693826 | HAVCR2    | 84868     | Homo sapiens hepatitis A virus cellular rece          |
| ILMN_1715607 | CHMP4A    | 29082     | Homo sapiens chromatin modifying protein              |
| ILMN_1730612 | DBNDD2    | 55861     | Homo sapiens dysbindin (dystrobrevin bind             |
| ILMN_1694731 | CLCN7     | 1186      | Homo sapiens chloride channel 7 (CLCN7),              |
| ILMN_1729237 | CYB5R1    | 51706     | Homo sapiens cytochrome b5 reductase 1                |
| ILMN_2114568 | GBP5      | 115362    | Homo sapiens guanylate binding protein 5              |
| ILMN_1752579 | ATP6V0A1  | 535       | Homo sapiens ATPase, H <sup>+</sup> transporting, lys |
| ILMN_1678671 | KLHL24    | 54800     | Homo sapiens kelch-like 24 (Drosophila) (K            |
| ILMN_1809477 | CARHSP1   | 23589     | Homo sapiens calcium regulated heat stabl             |
| ILMN_1807206 | DHRS1     | 115817    | Homo sapiens dehydrogenase/reductase (S               |
| ILMN_2327994 | AZIN1     | 51582     | Homo sapiens antizyme inhibitor 1 (AZIN1)             |
| ILMN_2337655 | WARS      | 7453      | Homo sapiens tryptophanyl-tRNA synthetas              |
| ILMN_2074860 | RN7SK     | 125050    | Homo sapiens RNA, 7SK small nuclear (RN               |
| ILMN_1811702 | GRN       | 2896      | Homo sapiens granulin (GRN), mRNA.                    |
| ILMN_1780825 | RRAS      | 6237      | Homo sapiens related RAS viral (r-ras) onc            |
| ILMN_1694479 | WDR18     | 57418     | Homo sapiens WD repeat domain 18 (WDF                 |
| ILMN_1772731 | HAGH      | 3029      | Homo sapiens hydroxyacylglutathione hydr              |
| ILMN_1688642 | LAMC3     | 10319     | Homo sapiens laminin, gamma 3 (LAMC3),                |
| ILMN_1801491 | SLC26A2   | 1836      | Homo sapiens solute carrier family 26 (sulf           |
| ILMN_1659610 | TJP3      | 27134     | Homo sapiens tight junction protein 3 (zona           |
| ILMN_2332105 | WRNIP1    | 56897     | Homo sapiens Werner helicase interacting              |
| ILMN_2104106 | XPR1      | 9213      | Homo sapiens xenotropic and polytropic re             |
| ILMN_1669966 | NDUFS7    | 374291    | Homo sapiens NADH dehydrogenase (ubiq                 |
| ILMN_1669878 | GUSB      | 2990      | Homo sapiens glucuronidase, beta (GUSB)               |
| ILMN_2162972 | LYZ       | 4069      | Homo sapiens lysozyme (renal amyloidosis              |
| ILMN_1691731 | PARP14    | 54625     | Homo sapiens poly (ADP-ribose) polymeras              |
| ILMN_1777565 | TAP2      | 6891      | Homo sapiens transporter 2, ATP-binding c             |
| ILMN_2111187 | ELOVL6    | 79071     | Homo sapiens ELOVL family member 6, elk               |
| ILMN_1738347 | RNPEP     | 6051      | Homo sapiens arginyl aminopeptidase (ami              |
| ILMN_2383693 | UPF2      | 26019     | Homo sapiens UPF2 regulator of nonsense               |
| ILMN_1789005 | ATP6V0C   | 527       | PREDICTED: Homo sapiens ATPase, H <sup>+</sup> tr     |
| ILMN_1698243 | C1orf85   | 112770    | Homo sapiens chromosome 1 open reading                |
| ILMN_2060413 | CD24      | 100133941 | Homo sapiens CD24 molecule (CD24), mR                 |
| ILMN_2061043 | CD48      | 962       | Homo sapiens CD48 molecule (CD48), mR                 |

Supplemental Table 1S

|              |              |           |                                             |
|--------------|--------------|-----------|---------------------------------------------|
| ILMN_1682930 | SIPA1        | 6494      | Homo sapiens signal-induced proliferation-i |
| ILMN_1773080 | OAZ1         | 4946      | Homo sapiens ornithine decarboxylase anti   |
| ILMN_1699931 | HCST         | 10870     | Homo sapiens hematopoietic cell signal tra  |
| ILMN_1712705 | RAB40C       | 57799     | Homo sapiens RAB40C, member RAS onc         |
| ILMN_2115005 | FGD2         | 221472    | Homo sapiens FYVE, RhoGEF and PH don        |
| ILMN_1769734 | NT5C3        | 51251     | Homo sapiens 5'-nucleotidase, cytosolic III |
| ILMN_1764764 | MUM1         | 84939     | Homo sapiens melanoma associated antige     |
| ILMN_1763000 | ADAP2        | 55803     | Homo sapiens ArfGAP with dual PH domai      |
| ILMN_1667796 | HBA2         | 3040      | Homo sapiens hemoglobin, alpha 2 (HBA2)     |
| ILMN_3297947 | LOC728368    | 728368    | PREDICTED: Homo sapiens misc_RNA (LC        |
| ILMN_2319424 | GYG2         | 8908      | Homo sapiens glycogenin 2 (GYG2), transc    |
| ILMN_1827736 |              |           | Homo sapiens cDNA clone IMAGE:526273        |
| ILMN_2380698 | DSTN         | 11034     | Homo sapiens destrin (actin depolymerizing  |
| ILMN_1651557 | KDEL2        | 143888    | Homo sapiens KDEL (Lys-Asp-Glu-Leu) co      |
| ILMN_2247594 | RPLP1        | 6176      | Homo sapiens ribosomal protein, large, P1   |
| ILMN_3177691 | LOC100130750 | 100130750 | PREDICTED: Homo sapiens misc_RNA (LC        |
| ILMN_1770053 | RBBP7        | 5931      | Homo sapiens retinoblastoma binding prote   |
| ILMN_1714082 | CMAS         | 55907     | Homo sapiens cytidine monophosphate N-ε     |
| ILMN_3201216 | LOC441550    | 441550    | PREDICTED: Homo sapiens misc_RNA (LC        |
| ILMN_1795243 | LOC220433    | 220433    | PREDICTED: Homo sapiens similar to 40S      |
| ILMN_1683678 | SPATS2L      | 26010     | Homo sapiens spermatogenesis associatete    |
| ILMN_1800659 | PGM1         | 5236      | Homo sapiens phosphoglucomutase 1 (PG       |
| ILMN_2051684 | LOC401152    | 401152    | Homo sapiens HCV F-transactivated protei    |
| ILMN_3283772 | LOC644237    | 644237    | PREDICTED: Homo sapiens misc_RNA (LC        |
| ILMN_1343295 | GAPDH        | 2597      | Homo sapiens glyceraldehyde-3-phosphate     |
| ILMN_1689088 | COLEC12      | 81035     | Homo sapiens collectin sub-family member    |
| ILMN_1727134 | KLHDC5       | 57542     | Homo sapiens kelch domain containing 5 (κ   |
| ILMN_3205162 | LOC646688    | 646688    | PREDICTED: Homo sapiens misc_RNA (LC        |
| ILMN_1684554 | COL16A1      | 1307      | Homo sapiens collagen, type XVI, alpha 1 (  |
| ILMN_2308849 | MYADM        | 91663     | Homo sapiens myeloid-associated different   |
| ILMN_1713394 | LOC441876    | 441876    | PREDICTED: Homo sapiens similar to 40S      |
| ILMN_1802252 | GAPDH        | 2597      | Homo sapiens glyceraldehyde-3-phosphate     |
| ILMN_2130180 | RPL13L       | 283345    | Homo sapiens ribosomal protein L13-like (F  |
| ILMN_1762899 | EGR1         | 1958      | Homo sapiens early growth response 1 (EC    |
| ILMN_1810577 | RPS4X        | 6191      | Homo sapiens ribosomal protein S4, X-linkε  |
| ILMN_2360415 | PRNP         | 5621      | Homo sapiens prion protein (PRNP), transc   |
| ILMN_2207533 | RPS17        | 6218      | Homo sapiens ribosomal protein S17 (RPS     |
| ILMN_2350634 | EFEMP1       | 2202      | Homo sapiens EGF-containing fibulin-like e  |
| ILMN_1733756 | COL12A1      | 1303      | Homo sapiens collagen, type XII, alpha 1 (C |
| ILMN_1746359 | RERG         | 85004     | Homo sapiens RAS-like, estrogen-regulate    |
| ILMN_1728011 | NLGN4X       | 57502     | Homo sapiens neuroligin 4, X-linked (NLGN   |
| ILMN_2375879 | VEGFA        | 7422      | Homo sapiens vascular endothelial growth    |
| ILMN_2059689 | TMEM54       | 113452    | Homo sapiens transmembrane protein 54 (     |
| ILMN_1758164 | STC1         | 6781      | Homo sapiens stanniocalcin 1 (STC1), mRI    |
| ILMN_2038778 | GAPDH        | 2597      | Homo sapiens glyceraldehyde-3-phosphate     |
| ILMN_1707810 | RPS5         | 6193      | Homo sapiens ribosomal protein S5 (RPS5     |
| ILMN_1689725 | RPLP1        | 6176      | Homo sapiens ribosomal protein, large, P1   |
| ILMN_1751097 | CREB3L2      | 64764     | Homo sapiens cAMP responsive element b      |
| ILMN_1681780 | MKX          | 283078    | Homo sapiens mohawk homeobox (MKX), 1       |
| ILMN_3205656 | LOC391075    | 391075    | PREDICTED: Homo sapiens misc_RNA (LC        |
| ILMN_1777286 | LOC388344    | 388344    | PREDICTED: Homo sapiens similar to ribos    |

Supplemental Table 1S

|              |           |        |                                               |
|--------------|-----------|--------|-----------------------------------------------|
| ILMN_1664610 | LOC402057 | 402057 | Homo sapiens similar to 40S ribosomal pro     |
| ILMN_1653203 | EFEMP2    | 30008  | Homo sapiens EGF-containing fibulin-like e    |
| ILMN_2125374 | CMAS      | 55907  | Homo sapiens cytidine monophosphate N-ε       |
| ILMN_2129234 | TMEM47    | 83604  | Homo sapiens transmembrane protein 47 (       |
| ILMN_1662640 | C20orf127 | 140851 | Homo sapiens chromosome 20 open readir        |
| ILMN_2395451 | ASS1      | 445    | Homo sapiens argininosuccinate synthetas      |
| ILMN_2386530 | RPLP1     | 6176   | Homo sapiens ribosomal protein, large, P1     |
| ILMN_1784706 | GABRE     | 2564   | Homo sapiens gamma-aminobutyric acid (C       |
| ILMN_1712305 | CYBRD1    | 79901  | Homo sapiens cytochrome b reductase 1 (C      |
| ILMN_3199929 | LOC390183 | 390183 | PREDICTED: Homo sapiens misc_RNA (LC          |
| ILMN_1768110 | ZAK       | 51776  | Homo sapiens sterile alpha motif and leucir   |
| ILMN_1684873 | ARSD      | 414    | Homo sapiens arylsulfatase D (ARSD), trar     |
| ILMN_1659027 | SLC2A1    | 6513   | Homo sapiens solute carrier family 2 (facilit |
| ILMN_1708778 | ASS1      | 445    | Homo sapiens argininosuccinate synthetas      |
| ILMN_2166831 | RPS4X     | 6191   | Homo sapiens ribosomal protein S4, X-link     |
| ILMN_1793476 | PRKCDBP   | 112464 | Homo sapiens protein kinase C, delta bindi    |
| ILMN_1707627 | TPI1      | 7167   | Homo sapiens triosephosphate isomerase        |
| ILMN_1676088 | MSRB3     | 253827 | Homo sapiens methionine sulfoxide reduct      |
| ILMN_1691156 | MT1A      | 4489   | Homo sapiens metallothionein 1A (MT1A), i     |
| ILMN_1709634 | CMBL      | 134147 | Homo sapiens carboxymethylenebutenolide       |
| ILMN_2087692 | CYBRD1    | 79901  | Homo sapiens cytochrome b reductase 1 (C      |
| ILMN_1733415 | MFAP5     | 8076   | Homo sapiens microfibrillar associated prot   |
| ILMN_1672503 | DPYSL2    | 1808   | Homo sapiens dihydropyrimidinase-like 2 (I    |
| ILMN_1796734 | SPARC     | 6678   | Homo sapiens secreted protein, acidic, cys    |
| ILMN_1704537 | PHGDH     | 26227  | Homo sapiens phosphoglycerate dehydrog        |
| ILMN_1802205 | RHOB      | 388    | Homo sapiens ras homolog gene family, me      |
| ILMN_1732151 | COL6A1    | 1291   | Homo sapiens collagen, type VI, alpha 1 (C    |
| ILMN_1806023 | JUN       | 3725   | Homo sapiens jun oncogene (JUN), mRNA         |
| ILMN_1796712 | S100A10   | 6281   | Homo sapiens S100 calcium binding protei      |
| ILMN_2046730 | S100A10   | 6281   | Homo sapiens S100 calcium binding protei      |
| ILMN_1776188 | MAP1LC3A  | 84557  | Homo sapiens microtubule-associated prot      |
| ILMN_1775708 | SLC2A3    | 6515   | Homo sapiens solute carrier family 2 (facilit |
| ILMN_3305475 | LOC729708 | 729708 | PREDICTED: Homo sapiens similar to rcTF       |
| ILMN_1729453 | TSPAN9    | 10867  | Homo sapiens tetraspanin 9 (TSPAN9), mF       |
| ILMN_1737988 | PRNP      | 5621   | Homo sapiens prion protein (PRNP), transc     |
| ILMN_1713561 | C20orf103 | 24141  | Homo sapiens chromosome 20 open readir        |
| ILMN_1730487 | CALD1     | 800    | Homo sapiens caldesmon 1 (CALD1), trans       |
| ILMN_1792455 | TMEM158   | 25907  | Homo sapiens transmembrane protein 158        |
| ILMN_2100437 | HBB       | 3043   | Homo sapiens hemoglobin, beta (HBB), mF       |
| ILMN_1672536 | FBLN1     | 2192   | Homo sapiens fibulin 1 (FBLN1), transcript    |
| ILMN_2341067 | NLGN4X    | 57502  | Homo sapiens neuroligin 4, X-linked (NLGN     |
| ILMN_1754795 | FAT1      | 2195   | Homo sapiens FAT tumor suppressor homc        |
| ILMN_2149226 | CAV1      | 857    | Homo sapiens caveolin 1, caveolae protein     |
| ILMN_1708934 | ADM       | 133    | Homo sapiens adrenomedullin (ADM), mRNA       |
| ILMN_2173611 | MT1E      | 4493   | Homo sapiens metallothionein 1E (MT1E), i     |
| ILMN_2188264 | CYR61     | 3491   | Homo sapiens cysteine-rich, angiogenic inc    |
| ILMN_1661599 | DDIT4     | 54541  | Homo sapiens DNA-damage-inducible tran        |
| ILMN_1718766 | MT1F      | 4494   | Homo sapiens metallothionein 1F (MT1F), i     |
| ILMN_1715401 | MT1G      | 4495   | Homo sapiens metallothionein 1G (MT1G), i     |
| ILMN_1781285 | DUSP1     | 1843   | Homo sapiens dual specificity phosphatase     |
| ILMN_1751607 | FOSB      | 2354   | Homo sapiens FBJ murine osteosarcoma v        |

Supplemental Table 1S

ILMN\_1669523 FOS

2353 Homo sapiens v-fos FBJ murine osteosarcc

Supplemental Table 1S

| p (Corr)           | p | Regulation*    | FC (abs)  | FC         | Log FC      |
|--------------------|---|----------------|-----------|------------|-------------|
|                    | 1 | 0.007691435 UP | 4.799252  | -4.799252  | -2.2628095  |
| 0.28282827         |   | 0.001943686 UP | 3.1758215 | -3.1758215 | -1.6671299  |
| 1                  |   | 0.010950411 UP | 2.9188452 | -2.9188452 | -1.5453976  |
| <b>0.01010101</b>  |   | 2.65E-004 UP   | 2.8268652 | -2.8268652 | -1.4992031  |
| 0.83838385         |   | 0.003274125 UP | 2.8061256 | -2.8061256 | -1.4885796  |
| 1                  |   | 0.014933238 UP | 2.7765532 | -2.7765532 | -1.473295   |
| <b>0.05050505</b>  |   | 9.85E-004 UP   | 2.7103949 | -2.7103949 | -1.438503   |
| 1                  |   | 0.01673172 UP  | 2.619494  | -2.619494  | -1.3892881  |
| 0.121212125        |   | 0.001445771 UP | 2.588296  | -2.588296  | -1.3720026  |
| <b>0.02020202</b>  |   | 6.48E-004 UP   | 2.5692863 | -2.5692863 | -1.3613677  |
| <b>0.030303031</b> |   | 7.87E-004 UP   | 2.4985914 | -2.4985914 | -1.321115   |
| 0.94949496         |   | 0.004227277 UP | 2.4940672 | -2.4940672 | -1.3185003  |
| 1                  |   | 0.017644422 UP | 2.452279  | -2.452279  | -1.2941232  |
| 1                  |   | 0.044879768 UP | 2.3595896 | -2.3595896 | -1.2385359  |
| 1                  |   | 0.022124395 UP | 2.3539748 | -2.3539748 | -1.2350988  |
| 1                  |   | 0.023775402 UP | 2.3314228 | -2.3314228 | -1.2212106  |
| 1                  |   | 0.01754079 UP  | 2.32864   | -2.32864   | -1.2194875  |
| 0.5959596          |   | 0.002527964 UP | 2.3008506 | -2.3008506 | -1.2021673  |
| 1                  |   | 0.02529319 UP  | 2.2260497 | -2.2260497 | -1.1544858  |
| 1                  |   | 0.009291469 UP | 2.2025473 | -2.2025473 | -1.139173   |
| 1                  |   | 0.04274278 UP  | 2.1970098 | -2.1970098 | -1.1355413  |
| 1                  |   | 0.029788107 UP | 2.1162233 | -2.1162233 | -1.0814918  |
| 1                  |   | 0.010018742 UP | 2.0851407 | -2.0851407 | -1.0601448  |
| 1                  |   | 0.011990373 UP | 2.0324802 | -2.0324802 | -1.0232413  |
| 1                  |   | 0.009013817 UP | 2.018056  | -2.018056  | -1.0129662  |
| 1                  |   | 0.04169217 UP  | 2.0040784 | -2.0040784 | -1.002939   |
| 1                  |   | 0.01745142 UP  | 1.9863731 | -1.9863731 | -0.99013656 |
| 1                  |   | 0.037032034 UP | 1.9819747 | -1.9819747 | -0.98693854 |
| 1                  |   | 0.015061763 UP | 1.9780812 | -1.9780812 | -0.98410165 |
| 1                  |   | 0.014807519 UP | 1.9551288 | -1.9551288 | -0.96726364 |
| 1                  |   | 0.04362536 UP  | 1.9541819 | -1.9541819 | -0.9665648  |
| 1                  |   | 0.023217257 UP | 1.9289486 | -1.9289486 | -0.9478147  |
| <b>0.05050505</b>  |   | 0.001067722 UP | 1.9220462 | -1.9220462 | -0.942643   |
| 1                  |   | 0.03294853 UP  | 1.8772472 | -1.8772472 | -0.9086186  |
| 1                  |   | 0.005137109 UP | 1.8649485 | -1.8649485 | -0.89913577 |
| 1                  |   | 0.00496161 UP  | 1.8110956 | -1.8110956 | -0.85686266 |
| 1                  |   | 0.039143156 UP | 1.7985386 | -1.7985386 | -0.84682506 |
| 1                  |   | 0.026397184 UP | 1.7972615 | -1.7972615 | -0.8458003  |
| 0.969697           |   | 0.004341777 UP | 1.797151  | -1.797151  | -0.8457116  |
| 0.85858583         |   | 0.003574868 UP | 1.7831486 | -1.7831486 | -0.83442694 |
| 1                  |   | 0.006234104 UP | 1.765034  | -1.765034  | -0.81969595 |
| 1                  |   | 0.008768678 UP | 1.7464391 | -1.7464391 | -0.8044163  |
| 1                  |   | 0.024091545 UP | 1.7461265 | -1.7461265 | -0.8041581  |
| 0.11111111         |   | 0.001329151 UP | 1.7174714 | -1.7174714 | -0.780286   |

Supplemental Table 1S

|             |                |           |            |             |
|-------------|----------------|-----------|------------|-------------|
| 0.25252524  | 0.001880808 UP | 1.7066371 | -1.7066371 | -0.7711564  |
| 0.7777778   | 0.003006373 UP | 1.7004381 | -1.7004381 | -0.7659065  |
| 1           | 0.043190513 UP | 1.6850723 | -1.6850723 | -0.7528105  |
| 1           | 0.006613552 UP | 1.6813649 | -1.6813649 | -0.74963284 |
| 0.82828283  | 0.003231082 UP | 1.677676  | -1.677676  | -0.7464641  |
| 0.17171717  | 0.001642084 UP | 1.6758196 | -1.6758196 | -0.74486685 |
| 1           | 0.016931146 UP | 1.6738061 | -1.6738061 | -0.74313235 |
| 1           | 0.0418709 UP   | 1.6691117 | -1.6691117 | -0.73908055 |
| 1           | 0.02257376 UP  | 1.6637845 | -1.6637845 | -0.7344686  |
| 0.17171717  | 0.001615166 UP | 1.6629092 | -1.6629092 | -0.73370934 |
| 0.4848485   | 0.002372029 UP | 1.6626135 | -1.6626135 | -0.73345286 |
| 1           | 0.015424254 UP | 1.6612636 | -1.6612636 | -0.73228097 |
| 1           | 0.04315604 UP  | 1.6526841 | -1.6526841 | -0.72481096 |
| 1           | 0.022914968 UP | 1.6493729 | -1.6493729 | -0.7219176  |
| 1           | 0.009550892 UP | 1.6475449 | -1.6475449 | -0.7203177  |
| 1           | 0.032069523 UP | 1.6467375 | -1.6467375 | -0.7196106  |
| 0.09090909  | 0.001289698 UP | 1.6312653 | -1.6312653 | -0.7059914  |
| 1           | 0.02867055 UP  | 1.6291533 | -1.6291533 | -0.7041223  |
| 1           | 0.008994055 UP | 1.629013  | -1.629013  | -0.703998   |
| 1           | 0.041174084 UP | 1.6288667 | -1.6288667 | -0.7038685  |
| 1           | 0.00518489 UP  | 1.619323  | -1.619323  | -0.69539076 |
| 1           | 0.012629087 UP | 1.6049693 | -1.6049693 | -0.68254566 |
| 0.15151516  | 0.001537626 UP | 1.6012185 | -1.6012185 | -0.67917013 |
| 0.15151516  | 0.001540735 UP | 1.5989845 | -1.5989845 | -0.6771559  |
| 1           | 0.008046195 UP | 1.598463  | -1.598463  | -0.6766854  |
| 1           | 0.029454762 UP | 1.5950463 | -1.5950463 | -0.6735983  |
| 1           | 0.013489665 UP | 1.5940878 | -1.5940878 | -0.6727311  |
| 1           | 0.00820983 UP  | 1.5847394 | -1.5847394 | -0.66424567 |
| 1           | 0.018856972 UP | 1.5810095 | -1.5810095 | -0.66084605 |
| 1           | 0.034690663 UP | 1.5789642 | -1.5789642 | -0.65897846 |
| 0.72727275  | 0.002849182 UP | 1.5784736 | -1.5784736 | -0.6585301  |
| 1           | 0.038808204 UP | 1.5739187 | -1.5739187 | -0.654361   |
| 0.7777778   | 0.003080587 UP | 1.57188   | -1.57188   | -0.65249103 |
| 1           | 0.018907834 UP | 1.5702616 | -1.5702616 | -0.6510049  |
| 1           | 0.044984758 UP | 1.5662098 | -1.5662098 | -0.6472775  |
| 1           | 0.015438386 UP | 1.5611229 | -1.5611229 | -0.6425841  |
| 1           | 0.02445228 UP  | 1.5602282 | -1.5602282 | -0.6417571  |
| 1           | 0.010293297 UP | 1.5592669 | -1.5592669 | -0.6408679  |
| 1           | 0.008788483 UP | 1.5580956 | -1.5580956 | -0.63978374 |
| 1           | 0.009309723 UP | 1.557785  | -1.557785  | -0.63949615 |
| 1           | 0.005378605 UP | 1.5573534 | -1.5573534 | -0.6390963  |
| 1           | 0.005837087 UP | 1.55045   | -1.55045   | -0.632687   |
| 1           | 0.022409001 UP | 1.5470349 | -1.5470349 | -0.6295057  |
| 0.11111111  | 0.001339337 UP | 1.5459976 | -1.5459976 | -0.6285381  |
| 1           | 0.03264293 UP  | 1.5381083 | -1.5381083 | -0.6211571  |
| 1           | 0.006159702 UP | 1.5376188 | -1.5376188 | -0.62069786 |
| 0.969697    | 0.004427246 UP | 1.5326377 | -1.5326377 | -0.6160167  |
| 1           | 0.005704618 UP | 1.529167  | -1.529167  | -0.612746   |
| 1           | 0.008046531 UP | 1.5266833 | -1.5266833 | -0.61040086 |
| 1           | 0.020432154 UP | 1.526098  | -1.526098  | -0.6098476  |
| 0.030303031 | 6.75E-004 UP   | 1.5228895 | -1.5228895 | -0.6068112  |

Supplemental Table 1S

|             |                  |           |            |             |
|-------------|------------------|-----------|------------|-------------|
| 1           | 0.007774072 UP   | 1.5225998 | -1.5225998 | -0.6065368  |
| 0           | 5.60E-005 UP     | 1.5210675 | -1.5210675 | -0.6050842  |
| 1           | 0.015353091 UP   | 1.5198573 | -1.5198573 | -0.60393584 |
| 0.01010101  | 3.22E-004 UP     | 1.5162688 | -1.5162688 | -0.60052556 |
| 1           | 0.04656766 UP    | 1.5155698 | -1.5155698 | -0.5998603  |
| 1           | 0.006251735 UP   | 1.506527  | -1.506527  | -0.59122646 |
| 1           | 0.012454917 UP   | 1.5062647 | -1.5062647 | -0.5909753  |
| 1           | 0.014670901 UP   | 1.5018586 | -1.5018586 | -0.58674896 |
| 1           | 0.026521664 DOWN | 1.5024333 | 1.5024333  | 0.58730096  |
| 0.94949496  | 0.00421235 DOWN  | 1.5033958 | 1.5033958  | 0.5882249   |
| 1           | 0.041957963 DOWN | 1.5063382 | 1.5063382  | 0.59104574  |
| 1           | 0.035786964 DOWN | 1.5101643 | 1.5101643  | 0.59470546  |
| 1           | 0.046056345 DOWN | 1.5129976 | 1.5129976  | 0.5974097   |
| 1           | 0.04047794 DOWN  | 1.5187292 | 1.5187292  | 0.6028646   |
| 1           | 0.013641273 DOWN | 1.5187676 | 1.5187676  | 0.6029011   |
| 1           | 0.006338574 DOWN | 1.5205492 | 1.5205492  | 0.60459244  |
| 1           | 0.034224134 DOWN | 1.5281091 | 1.5281091  | 0.6117475   |
| 1           | 0.004945448 DOWN | 1.5303737 | 1.5303737  | 0.613884    |
| 1           | 0.016218321 DOWN | 1.5322486 | 1.5322486  | 0.6156504   |
| 1           | 0.015699606 DOWN | 1.5375173 | 1.5375173  | 0.62060267  |
| 1           | 0.017509945 DOWN | 1.5431328 | 1.5431328  | 0.6258622   |
| 1           | 0.014940954 DOWN | 1.5489773 | 1.5489773  | 0.63131595  |
| 1           | 0.017919736 DOWN | 1.5491439 | 1.5491439  | 0.63147116  |
| 0.33333334  | 0.002017794 DOWN | 1.5532614 | 1.5532614  | 0.63530064  |
| 0.08080808  | 0.001247029 DOWN | 1.5537333 | 1.5537333  | 0.6357389   |
| 1           | 0.049487554 DOWN | 1.5541135 | 1.5541135  | 0.6360919   |
| 1           | 0.015164889 DOWN | 1.5586059 | 1.5586059  | 0.64025617  |
| 0.989899    | 0.00475682 DOWN  | 1.5643737 | 1.5643737  | 0.6455852   |
| 1           | 0.038844056 DOWN | 1.5657543 | 1.5657543  | 0.6468578   |
| 1           | 0.04673143 DOWN  | 1.5672348 | 1.5672348  | 0.6482213   |
| 1           | 0.01088111 DOWN  | 1.5707736 | 1.5707736  | 0.65147525  |
| 0.83838385  | 0.003315591 DOWN | 1.5721841 | 1.5721841  | 0.65277016  |
| 0.9292929   | 0.004080203 DOWN | 1.5735493 | 1.5735493  | 0.65402234  |
| 1           | 0.018315952 DOWN | 1.5758042 | 1.5758042  | 0.6560883   |
| 1           | 0.010845139 DOWN | 1.5817118 | 1.5817118  | 0.66148674  |
| 1           | 0.012819028 DOWN | 1.5861524 | 1.5861524  | 0.6655314   |
| 0.969697    | 0.004347692 DOWN | 1.5868943 | 1.5868943  | 0.666206    |
| 1           | 0.043302137 DOWN | 1.5887548 | 1.5887548  | 0.66789645  |
| 1           | 0.006801711 DOWN | 1.589618  | 1.589618   | 0.6686801   |
| 0.9292929   | 0.004054786 DOWN | 1.5915092 | 1.5915092  | 0.6703955   |
| 1           | 0.022889167 DOWN | 1.5996246 | 1.5996246  | 0.6777334   |
| 1           | 0.0488545 DOWN   | 1.600928  | 1.600928   | 0.67890835  |
| 1           | 0.030164508 DOWN | 1.6047238 | 1.6047238  | 0.682325    |
| 1           | 0.024440683 DOWN | 1.6115845 | 1.6115845  | 0.68847984  |
| 0.18181819  | 0.00166122 DOWN  | 1.6135684 | 1.6135684  | 0.69025475  |
| 1           | 0.011548934 DOWN | 1.6138971 | 1.6138971  | 0.6905486   |
| 1           | 0.027061561 DOWN | 1.616362  | 1.616362   | 0.69275033  |
| 1           | 0.034832872 DOWN | 1.6269795 | 1.6269795  | 0.70219606  |
| 1           | 0.02536943 DOWN  | 1.6285919 | 1.6285919  | 0.70362514  |
| 0.060606062 | 0.001152991 DOWN | 1.6301616 | 1.6301616  | 0.705015    |
| 1           | 0.015315795 DOWN | 1.6394435 | 1.6394435  | 0.7132062   |



Supplemental Table 1S

|                   |             |      |           |           |            |
|-------------------|-------------|------|-----------|-----------|------------|
| 0.3131313         | 0.002005578 | DOWN | 1.6508459 | 1.6508459 | 0.72320545 |
| 1                 | 0.03667991  | DOWN | 1.6524019 | 1.6524019 | 0.7245646  |
| 1                 | 0.006158799 | DOWN | 1.6537937 | 1.6537937 | 0.72577924 |
| 1                 | 0.03562813  | DOWN | 1.6541766 | 1.6541766 | 0.72611326 |
| 1                 | 0.014653291 | DOWN | 1.6865356 | 1.6865356 | 0.7540628  |
| 1                 | 0.034009233 | DOWN | 1.6921077 | 1.6921077 | 0.75882137 |
| 1                 | 0.011208121 | DOWN | 1.6967322 | 1.6967322 | 0.76275885 |
| 1                 | 0.010930384 | DOWN | 1.6967889 | 1.6967889 | 0.7628071  |
| 1                 | 0.031841163 | DOWN | 1.6980779 | 1.6980779 | 0.76390266 |
| 1                 | 0.010106704 | DOWN | 1.710241  | 1.710241  | 0.7741996  |
| 1                 | 0.035454705 | DOWN | 1.71103   | 1.71103   | 0.77486503 |
| 1                 | 0.004830824 | DOWN | 1.7139913 | 1.7139913 | 0.7773598  |
| 1                 | 0.03663659  | DOWN | 1.7153968 | 1.7153968 | 0.7785423  |
| 1                 | 0.031968873 | DOWN | 1.7248499 | 1.7248499 | 0.78647083 |
| 1                 | 0.005853472 | DOWN | 1.730538  | 1.730538  | 0.7912206  |
| 1                 | 0.008402999 | DOWN | 1.7449756 | 1.7449756 | 0.8032068  |
| 1                 | 0.014029294 | DOWN | 1.7580591 | 1.7580591 | 0.8139836  |
| 1                 | 0.007208883 | DOWN | 1.7623824 | 1.7623824 | 0.817527   |
| 1                 | 0.030202853 | DOWN | 1.7625744 | 1.7625744 | 0.8176842  |
| 1                 | 0.04687567  | DOWN | 1.7627488 | 1.7627488 | 0.8178269  |
| 1                 | 0.041963972 | DOWN | 1.7638112 | 1.7638112 | 0.81869614 |
| 1                 | 0.025688829 | DOWN | 1.8199583 | 1.8199583 | 0.86390543 |
| 1                 | 0.04226047  | DOWN | 1.8214407 | 1.8214407 | 0.86508    |
| 1                 | 0.031217001 | DOWN | 1.8215812 | 1.8215812 | 0.86519134 |
| 1                 | 0.040813293 | DOWN | 1.8400285 | 1.8400285 | 0.87972814 |
| 1                 | 0.03919907  | DOWN | 1.8732387 | 1.8732387 | 0.90553474 |
| 1                 | 0.007202414 | DOWN | 1.8766801 | 1.8766801 | 0.90818274 |
| 1                 | 0.016655732 | DOWN | 1.8794011 | 1.8794011 | 0.91027296 |
| 1                 | 0.023617832 | DOWN | 1.8949435 | 1.8949435 | 0.9221548  |
| 1                 | 0.022621391 | DOWN | 1.9003344 | 1.9003344 | 0.92625326 |
| 1                 | 0.010146182 | DOWN | 1.9081507 | 1.9081507 | 0.9321751  |
| 1                 | 0.04945883  | DOWN | 1.9196507 | 1.9196507 | 0.94084376 |
| <b>0.02020202</b> | 4.87E-004   | DOWN | 1.9344338 | 1.9344338 | 0.95191133 |
| 1                 | 0.017906472 | DOWN | 1.9373955 | 1.9373955 | 0.95411843 |
| 1                 | 0.021104697 | DOWN | 1.96315   | 1.96315   | 0.9731704  |
| 1                 | 0.006607299 | DOWN | 1.9697472 | 1.9697472 | 0.9780105  |
| 0.68686867        | 0.002758033 | DOWN | 1.9768394 | 1.9768394 | 0.98319566 |
| 1                 | 0.012913531 | DOWN | 2.0000072 | 2.0000072 | 1.0000051  |
| 1                 | 0.030624501 | DOWN | 2.0079334 | 2.0079334 | 1.0057114  |
| 1                 | 0.012794066 | DOWN | 2.0282693 | 2.0282693 | 1.0202492  |
| 1                 | 0.02677563  | DOWN | 2.0871613 | 2.0871613 | 1.061542   |
| 0.97979796        | 0.004659777 | DOWN | 2.1299665 | 2.1299665 | 1.0908307  |
| <b>0.01010101</b> | 1.48E-004   | DOWN | 2.2187963 | 2.2187963 | 1.1497772  |
| 1                 | 0.00847594  | DOWN | 2.2404315 | 2.2404315 | 1.1637766  |
| 1                 | 0.015709817 | DOWN | 2.3071432 | 2.3071432 | 1.2061075  |
| 1                 | 0.01784236  | DOWN | 2.3794377 | 2.3794377 | 1.2506206  |
| 1                 | 0.007131056 | DOWN | 2.460769  | 2.460769  | 1.2991092  |
| <b>0.05050505</b> | 9.99E-004   | DOWN | 2.4829366 | 2.4829366 | 1.3120474  |
| 1                 | 0.0333096   | DOWN | 2.576056  | 2.576056  | 1.3651639  |
| 1                 | 0.013629663 | DOWN | 2.632814  | 2.632814  | 1.3966055  |
| 1                 | 0.022279652 | DOWN | 2.7629485 | 2.7629485 | 1.4662087  |

Supplemental Table 1S

|            |                |          |          |           |
|------------|----------------|----------|----------|-----------|
| 0.01010101 | 2.05E-004 DOWN | 4.224708 | 4.224708 | 2.0788517 |
|------------|----------------|----------|----------|-----------|
